# Supplementary material for: Magnetostratigraphic resolution of the late Ediacaran paleomagnetic enigma
Source: Research Square preprint supplement (doi:10.21203/rs.3.rs-5102982/v1), 2024-10-08
Supplement: Supplementary file 1 [file 45f5ca5681598dadef851d05.xlsx]

## Sheet: Sheet1
	Dates (Ma)											Composition					Isotopic Ratios
	206Pb/								207Pb/																	206Pb/		207Pb/
	238U	±2σ	206Pb/	±2σ	207Pb/	±2σ	207Pb/	±2σ	206Pb	±2σ		Th/	Pb*	Pbc	Pb*/	Th/U	206Pb/	208Pb/	207Pb/		207Pb/		206Pb/		Corr.	238U		206Pb
	<Th> a	abs	238U b	abs	235U b	abs	206Pb b	abs	<Th> a	abs	% disc c	U d	(pg) e	(pg) f	Pbc g	(magma) h	204Pb i	206Pb j	206Pb j	±2σ %	235U j	±2σ %	238U j	±2σ %	coef.	<Th> j,a	±2σ %	<Th> j,a	±2σ %
MR41
MR41 z3	561.99	0.24	561.9	0.24	561.46	0.34	559.7	1.2	559.3	1.2	-0.4	0.35	53.7	0.13	412.3	3.5	24590	0.11	0.058825	0.047	0.73837	0.08	0.091076	0.045	0.716	0.091091	0.045	0.058816	0.047
MR41 z1	562.12	0.16	562.03	0.16	561.7	0.96	560.3	4.6	560	4.6	-0.3	0.37	30.1	0.22	134.6	3.5	8008	0.114	0.05884	0.21	0.7388	0.22	0.091098	0.03	0.511	0.091114	0.03	0.058834	0.21
MR41 z7	562.16	0.21	562.07	0.21	562.77	0.34	565.6	1.4	565.2	1.4	0.62	0.23	57.3	0.21	277.2	3.5	17101	0.072	0.058986	0.057	0.74062	0.078	0.091105	0.038	0.532	0.091121	0.038	0.058976	0.057
MR41 z2	562.22	0.29	562.12	0.29	561.65	0.73	559.7	3	559.3	3	-0.43	0.3	23	0.29	78.8	3.5	4783	0.094	0.058827	0.14	0.7387	0.17	0.091114	0.053	0.652	0.09113	0.053	0.058817	0.14
MR41 z6	562.28	0.18	562.18	0.18	562.66	0.27	564.6	1.1	564.2	1.1	0.42	0.22	111	0.13	846.6	3.5	52381	0.068	0.058958	0.039	0.74043	0.062	0.091125	0.033	0.573	0.09114	0.033	0.058948	0.039
MR41 z5	562.42	0.16	562.33	0.16	562.83	0.25	564.9	1	564.5	1	0.45	0.34	87.2	0.18	473.2	3.5	29521	0.107	0.058966	0.035	0.74073	0.058	0.091149	0.03	0.569	0.091164	0.03	0.058957	0.035
MR41 z4	563.75	0.26	563.66	0.26	568.6	0.55	588.4	2.2	588	2.2	4.21	0.36	22.4	0.19	115.9	3.5	6917	0.111	0.059608	0.096	0.75065	0.13	0.091375	0.049	0.657	0.09139	0.049	0.059598	0.096
MR34
MR34 z3	566.4	0.6	566.3	0.6	566.57	0.87	567.6	3.1	567.2	3.1	0.23	0.18	36.9	0.24	150.8	3.5	9436	0.057	0.059041	0.14	0.7471	0.2	0.09182	0.11	0.732	0.091838	0.11	0.059031	0.14
MR34 z5	566.42	0.61	566.33	0.61	566.44	0.81	566.9	2.6	566.5	2.6	0.09	0.18	36.9	0.26	143.5	3.5	8978	0.057	0.05902	0.12	0.7469	0.19	0.09183	0.11	0.782	0.091842	0.11	0.05901	0.12
MR34 z1	566.69	0.54	566.59	0.54	566.26	0.72	564.9	2.9	564.6	2.9	-0.29	0.2	58.3	0.18	320.8	3.5	19736	0.062	0.058968	0.13	0.7466	0.16	0.091871	0.099	0.574	0.091887	0.099	0.058958	0.13
MR34 z2	566.72	0.32	566.63	0.32	566.99	0.41	568.4	1.2	568	1.2	0.32	0.2	91.8	0.16	579	3.5	36048	0.061	0.059063	0.046	0.74787	0.095	0.091877	0.06	0.826	0.091893	0.06	0.059052	0.046
MR34 z4	567.06	0.32	566.97	0.32	566.82	0.95	566.2	4.3	565.8	4.3	-0.13	0.34	13.5	0.18	74.2	3.5	4374	0.106	0.059	0.19	0.7476	0.22	0.091935	0.058	0.481	0.09195	0.058	0.058993	0.19
RA03
RA03 z6	567.866	0.091	567.786	0.091	568.11	0.2	569.39	0.9	569.07	0.9	0.28	0.18	122.9	0.2	629.556	0.9	39923	0.056	0.059088	0.026	0.7498	0.046	0.092073	0.017	0.426	0.092087	0.017	0.05908	0.026
RA03 z3	567.888	0.097	567.808	0.097	568.13	0.18	569.44	0.8	569.11	0.8	0.29	0.17	140.5	0.16	888.505	0.85	56549	0.052	0.05909	0.018	0.74984	0.042	0.092077	0.018	0.483	0.09209	0.018	0.059081	0.018
RA03 z5	567.9	0.087	567.82	0.087	568.11	0.23	569.3	1	568.9	1	0.25	0.18	90.1	0.2	440.679	0.9	27963	0.056	0.059085	0.036	0.7498	0.053	0.092079	0.016	0.447	0.092092	0.016	0.059077	0.036
RA03 z4	567.91	0.1	567.83	0.1	568.13	0.18	569.35	0.75	569.03	0.75	0.27	0.17	315.8	0.13	2472.23	0.85	157257	0.053	0.0590876	0.012	0.74984	0.041	0.09208	0.019	0.561	0.092094	0.019	0.059079	0.012
RA03 z2	567.998	0.064	567.918	0.064	568.27	0.18	569.68	0.83	569.35	0.83	0.31	0.18	463.4	0.66	707.026	0.9	44905	0.055	0.059096	0.02	0.75008	0.042	0.092095	0.012	0.455	0.092109	0.012	0.059088	0.02
RA03 z1	568.003	0.094	567.923	0.094	568.12	0.19	568.9	0.82	568.58	0.82	0.17	0.18	300.4	0.35	846.69	0.9	53689	0.056	0.059075	0.019	0.74982	0.044	0.092096	0.017	0.527	0.09211	0.017	0.059067	0.019
italic - analyses omited from the weighted mean dates
a Corrected for initial Th/U disequilibrium using radiogenic 208Pb and Th/U[magma] specified.
b Isotopic dates calculated using λ238 = 1.55125E-10 (Jaffey et al. 1971) and λ235 = 9.8485E-10 (Jaffey et al. 1971).
c % discordance = 100 - (100 * (206Pb/238U date) / (207Pb/206Pb date))
d Th contents calculated from radiogenic 208Pb and 230Th-corrected 206Pb/238U date of the sample, assuming concordance between U-Pb Th-Pb systems.
e Total mass of radiogenic Pb.
f Total mass of common Pb.
g Ratio of radiogenic Pb (including 208Pb) to common Pb.
h Th/U ratio of magma from which mineral crystallized.
i Measured ratio corrected for fractionation and spike contribution only.
j Measured ratios corrected for fractionation, tracer and blank.
