# Supplementary material for: Magnetostratigraphic resolution of the late Ediacaran paleomagnetic enigma
Source: Research Square preprint supplement (doi:10.21203/rs.3.rs-5102982/v1), 2024-10-08
Supplement: Supplementary file 2 [file a97fab3d145cad5ca36296ba.xlsx]

## Sheet: Sheet1
	Age (Ma)	longitude (Plon)	latitude (Plat)	N/n	dp	dm	tmaj longitude	tmaj latitude	amaj	tmin longitude	tmin latitude	amin
Bou Azzer volcanics (this study)	568-565	23.83	25.74	14			321.07	-43.51	78.03	273.7	35.51	10.36
Bou Azzer redbeds (this study)	568-565	17.51	10.41	16	12.56	13.97
Robert et al, 2017	569-565	48.24	32.36	29			174.01	42.69	27.84	296.56	42.69	16.27
Meert et al, 1994	~570	343.57	20.33	17			237.98	35.95	45.64	96.97	46.99	8.79
Kodama, 2020	~574	351.18	9.69	27	5.06	9.91
Halls et al, 2015	583.4	356.99	-34.76	26			297.08	35.86	22.32	237.71	-35.18	6.75
McCausland et al, 2011	585	332.96	24.12	15			128.36	63.79	46.21	58.58	-9.66	11.71
N = number of site means used to calculate pole
n = number of samples used to calculate
dp = uncertainty in latitude
dm = uncertainty in longitude
Bingham parameters:
tmaj longitude = longitude of the ellipse major axis
tmaj latitude= latitude of ellipse major axis
amaj = ellipse major axis uncertainty
tmin longitude = longitude of ellipse minor axis
tmin latitude = latitude of ellipse minor axis
amin = ellipse minor axis uncertainty
